# Supplementary material for: Results from a long-term open-label extension study of adjunctive buprenorphine/samidorphan combination in patients with major depressive disorder
Source: PubMed Central journal article supplement (PMC6897901; doi:10.1038/s41386-019-0451-3), 2019-06-29

Supplemental Figure 1

Patient Disposition

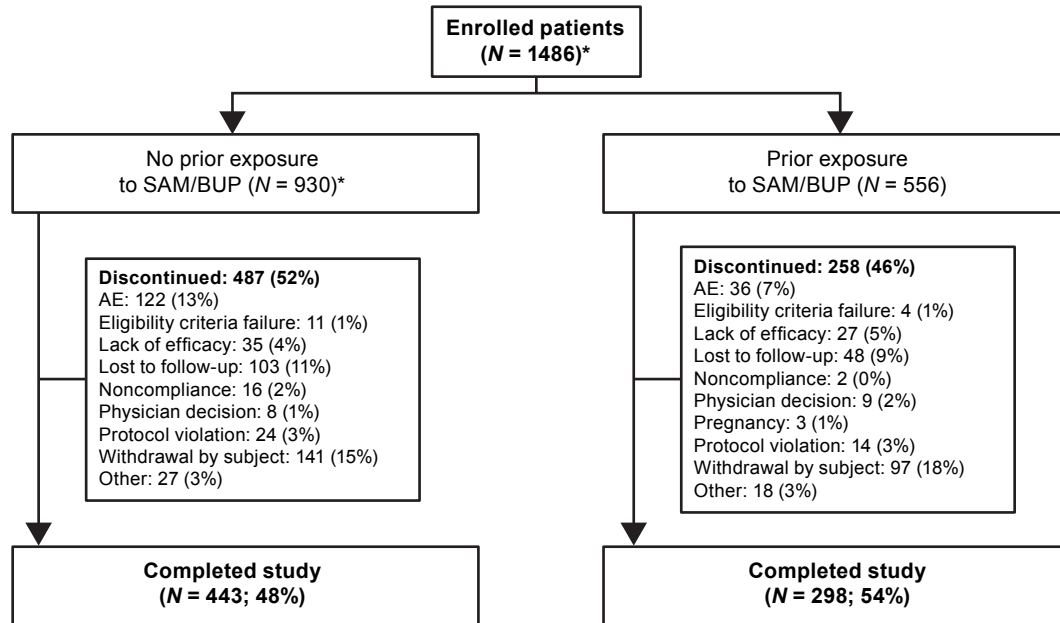

Supplement: 41386_2019_451_MOESM2_ESM.pdf [file 41386_2019_451_MOESM2_ESM.pdf]
